# Supplementary material for: A novel splice variant of Elp3/Kat9 regulates mitochondrial tRNA modification and function
Source: Sci Rep. 2022 Aug 31;12:14804. doi: 10.1038/s41598-022-18114-x (PMC9433433; doi:10.1038/s41598-022-18114-x)
Supplement: Supplementary file 2 — Supplementary Information. [file 41598_2022_18114_MOESM2_ESM.xlsx]

## Sheet: Sheet1
Sequence	Synonym	TargetP	Predotar	Wolfpsort	Total Score (Arbitrary Unit)	Wolfpsort (N)	Total Score (Arbitrary Unit)
ENSP00000445558	ELP3, Elongator complex protein 3, KAT9	79.7	35	26	140.7	77.8443	192.544
ENSP00000293404	NAGS, N-acetylglutamate synthase, mitochondrial (Amino-acid acetyltransferase), AGAS, ARGA, NAT7	62.1	44	18	124.1	53.8922	159.992
ENSP00000468717	AANAT, arylalkylamine N-acetyltransferase	81	16	17	114	50.8982	147.898
ENSP00000462835	NAT9	44.4	36	20	100.4	59.8802	140.28
ENSP00000439242	ELP3, Elongator complex protein 3, KAT9	79.9	7	17	103.9	50.8982	137.798
ENSP00000464281	NAT9	39	32	19	90	56.8862	127.886
ENSP00000464505	NAT9	41	32	17	90	50.8982	123.898
ENSP00000436000	KAT5, HTATIP, TIP60	55.5	17	17	89.5	50.8982	123.398
ENSP00000429180	ELP3, Elongator complex protein 3, KAT9	52.7	15	18	85.7	53.8922	121.592
ENSP00000408934	MCM3AP	58.9	0	18	76.9	53.8922	112.792
ENSP00000447537	GCN5L1, BLOC1S1, BLOS1	66.3	4	14	84.3	41.9162	112.216
ENSP00000436012	KAT5, HTATIP, TIP60	57.1	17	12	86.1	35.9281	110.028
ENSP00000450328	GCN5L1, BLOC1S1, BLOS1	66.3	4	13	83.3	38.9222	109.222
ENSP00000435569	NAT10, ALP, KIAA1709, NET43, FLJ10774, FLJ12179	45.5	5	16.5	67	49.4012	99.9012
ENSP00000297798	HGSNAT, heparan-alpha-glucosaminide N-acetyltransferase, TMEM76, HGNAT, FLJ32731	87.1	7	0	94.1	0	94.1
ENSP00000417488	NAT13, N-acetyltransferase 13 (GCN5-related), NAA50, FLJ13194, MAK3(?), NAT5(?), San	44.6	37	4	85.6	11.976	93.576
ENSP00000418473	NAT13, N-acetyltransferase 13 (GCN5-related), NAA50, FLJ13194, MAK3(?), NAT5(?), San	44.6	37	4	85.6	11.976	93.576
ENSP00000465408	NAGS, N-acetylglutamate synthase, mitochondrial (Amino-acid acetyltransferase), AGAS, ARGA, NAT7	72	Discarding	7	79	20.9581	92.9581
ENSP00000437324	NAT10, ALP, KIAA1709, NET43, FLJ10774, FLJ12179	45.5	5	14	64.5	41.9162	92.4162
ENSP00000389524	HGSNAT, heparan-alpha-glucosaminide N-acetyltransferase, TMEM76, HGNAT, FLJ32731	83.3	4	0	87.3	0	87.3
ENSP00000402361	MED24, CRSP100, CRSP4, DRIP100, KIAA0130, THRAP4, TRAP100	34.7	12	11.5	58.2	34.4311	81.1311
ENSP00000257829	NAT10, ALP, KIAA1709, NET43, FLJ10774, FLJ12179	45.5	5	10	60.5	29.9401	80.4401
ENSP00000380820	MCM3AP	60.9	0	6.5	67.4	19.4611	80.3611
ENSP00000291688	MCM3AP	60.9	0	6.5	67.4	19.4611	80.3611
ENSP00000463353	NAT9	13.1	15	17	45.1	50.8982	78.9982
ENSP00000350467	NAT9	13.1	15	16	44.1	47.9042	76.0042
ENSP00000463824	NAT9	13.1	15	16	44.1	47.9042	76.0042
ENSP00000462120	NAT9	13.1	15	16	44.1	47.9042	76.0042
ENSP00000462019	NAT9	14.5	16	15	45.5	44.9102	75.4102
ENSP00000462454	NAT9	14.5	16	15	45.5	44.9102	75.4102
ENSP00000463523	NAT9	14.3	16	15	45.3	44.9102	75.2102
ENSP00000414235	MGEA5, HEXC, KIAA0679, MEA5 (NOCAT, bifunctional)	64.4	Discarding	3	67.4	8.98204	73.382
ENSP00000418490	NAT13, N-acetyltransferase 13 (GCN5-related), NAA50, FLJ13194, MAK3(?), NAT5(?), San	14.3	2	19	35.3	56.8862	73.1862
ENSP00000464142	NAT9	14.5	16	14	44.5	41.9162	72.4162
ENSP00000429029	HGSNAT, heparan-alpha-glucosaminide N-acetyltransferase, TMEM76, HGNAT, FLJ32731	57	12	0	69	0	69
ENSP00000463860	NAT9	14.7	15	13	42.7	38.9222	68.6222
ENSP00000272425	NAT8	44	2	7	53	20.9581	66.9581
ENSP00000267974	NCOA2, BHLHE75, TIF2, KAT13C, GRIP, p160	35.3	0	10	45.3	29.9401	65.2401
ENSP00000330512	CDYL, CDYL1	45.6	7	4	56.6	11.976	64.576
ENSP00000296543	NAA15, FLJ13340, NARG1, NATH, TBDN100	41.8	22	0	63.8	0	63.8
ENSP00000381920	NAA15, FLJ13340, NARG1, NATH, TBDN100	41.8	22	0	63.8	0	63.8
ENSP00000371257	CIITA	28.8	5	9	42.8	26.9461	60.7461
ENSP00000401237	NAA60, HAT4, NAT15	29.8	15	5	49.8	14.9701	59.7701
ENSP00000464225	MED24, CRSP100, CRSP4, DRIP100, KIAA0130, THRAP4, TRAP100	24.1	16	6	46.1	17.9641	58.0641
ENSP00000417837	NAT13, N-acetyltransferase 13 (GCN5-related), NAA50, FLJ13194, MAK3(?), NAT5(?), San	10.9	2	14	26.9	41.9162	54.8162
ENSP00000450939	NAA30, NAT12, Mak3p, MAK3, FLJ35355, C14orf35	15.3	0	13	28.3	38.9222	54.2222
ENSP00000451255	NAA30, NAT12, Mak3p, MAK3, FLJ35355, C14orf35	8.9	0	15	23.9	44.9102	53.8102
ENSP00000421611	TAF1(TAFII250)	53.3	Discarding	0	53.3	0	53.3
ENSP00000409477	KAT7, HBO1, HBOa, MYST2	52.2	1	0	53.2	0	53.2
ENSP00000448171	GCN5L1, BLOC1S1, BLOS1	11	0	14	25	41.9162	52.9162
ENSP00000429939	KAT7, HBO1, HBOa, MYST2	51.6	1	0	52.6	0	52.6
ENSP00000399638	KAT6A, MOZ, MYST3, RUNXBP2, ZNF220	50.8	1	0	51.8	0	51.8
ENSP00000316328	CIITA	28.8	5	6	39.8	17.9641	51.7641
ENSP00000433011	NAT10, ALP, KIAA1709, NET43, FLJ10774, FLJ12179	12.4	3	12	27.4	35.9281	51.3281
ENSP00000419729	NAT13, N-acetyltransferase 13 (GCN5-related), NAA50, FLJ13194, MAK3(?), NAT5(?), San	12.9	2	11	25.9	32.9341	47.8341
ENSP00000257899	GCN5L1, BLOC1S1, BLOS1	30.2	2	5	37.2	14.9701	47.1701
ENSP00000443194	NAT1, N-acetyltransferase 1 (arylamine N-acetyltransferase), AAC1	12.2	1	11	24.2	32.9341	46.1341
ENSP00000394740	CDYL, CDYL1	38.8	6	0	44.8	0	44.8
ENSP00000406517	TAF1(TAFII250)	44.2	Discarding	0	44.2	0	44.2
ENSP00000225916	KAT2A, GCN5, GCN5L2, HGCN5	44	0	0	44	0	44
ENSP00000454592	KAT8, MOF, MYST1	8	Discarding	12	20	35.9281	43.9281
ENSP00000417110	NAT13, N-acetyltransferase 13 (GCN5-related), NAA50, FLJ13194, MAK3(?), NAT5(?), San	16.9	0	9	25.9	26.9461	43.8461
ENSP00000386282	ATF-2, CRE-BP1, CREB2, HB16, TREB7	18.3	13	4	35.3	11.976	43.276
ENSP00000376282	AANAT, arylalkylamine N-acetyltransferase	40.7	0	0	40.7	0	40.7
ENSP00000425909	CSRP2BP, ATAC2, CRP2BP, dJ717M23.1, KAT14, PRO1194	9.5	24	2	35.5	5.98802	39.488
ENSP00000448605	GCN5L1, BLOC1S1, BLOS1	11.5	0	9	20.5	26.9461	38.4461
ENSP00000450218	GCN5L1, BLOC1S1, BLOS1	11.5	0	9	20.5	26.9461	38.4461
ENSP00000377685	MED24, CRSP100, CRSP4, DRIP100, KIAA0130, THRAP4, TRAP100	21.6	16	0	37.6	0	37.6
ENSP00000348610	MED24, CRSP100, CRSP4, DRIP100, KIAA0130, THRAP4, TRAP100	21.6	16	0	37.6	0	37.6
ENSP00000250615	AANAT, arylalkylamine N-acetyltransferase	27.2	1	3	31.2	8.98204	37.182
ENSP00000377686	MED24, CRSP100, CRSP4, DRIP100, KIAA0130, THRAP4, TRAP100	21.1	16	0	37.1	0	37.1
ENSP00000462646	MED24, CRSP100, CRSP4, DRIP100, KIAA0130, THRAP4, TRAP100	21.1	16	0	37.1	0	37.1
ENSP00000435766	KAT5, HTATIP, TIP60	6	Discarding	10	16	29.9401	35.9401
ENSP00000438802	MED24, CRSP100, CRSP4, DRIP100, KIAA0130, THRAP4, TRAP100	19.9	16	0	35.9	0	35.9
ENSP00000298406	NAA30, NAT12, Mak3p, MAK3, FLJ35355, C14orf35	35	Discarding	0	35	0	35
ENSP00000377684	MED24, CRSP100, CRSP4, DRIP100, KIAA0130, THRAP4, TRAP100	34.9	0	0	34.9	0	34.9
ENSP00000440100	MED24, CRSP100, CRSP4, DRIP100, KIAA0130, THRAP4, TRAP100	34.9	0	0	34.9	0	34.9
ENSP00000438767	MED24, CRSP100, CRSP4, DRIP100, KIAA0130, THRAP4, TRAP100	34.9	0	0	34.9	0	34.9
ENSP00000463480	MED24, CRSP100, CRSP4, DRIP100, KIAA0130, THRAP4, TRAP100	34.9	0	0	34.9	0	34.9
ENSP00000392276	MED24, CRSP100, CRSP4, DRIP100, KIAA0130, THRAP4, TRAP100	33.6	0	0	33.6	0	33.6
ENSP00000438630	MED24, CRSP100, CRSP4, DRIP100, KIAA0130, THRAP4, TRAP100	33.6	0	0	33.6	0	33.6
ENSP00000463528	MED24, CRSP100, CRSP4, DRIP100, KIAA0130, THRAP4, TRAP100	33.6	0	0	33.6	0	33.6
ENSP00000264110	ATF-2, CRE-BP1, CREB2, HB16, TREB7	21.2	12	0	33.2	0	33.2
ENSP00000376327	ATF-2, CRE-BP1, CREB2, HB16, TREB7	21.2	12	0	33.2	0	33.2
ENSP00000386526	ATF-2, CRE-BP1, CREB2, HB16, TREB7	21.2	12	0	33.2	0	33.2
ENSP00000368716	NAA16, FLJ22054, MGC40612, NARG1L, PRO2435	24	8	0	32	0	32
ENSP00000386103	NAA16, FLJ22054, MGC40612, NARG1L, PRO2435	24	8	0	32	0	32
ENSP00000368674	NAA16, FLJ22054, MGC40612, NARG1L, PRO2435	24	8	0	32	0	32
ENSP00000256398	ELP3, Elongator complex protein 3, KAT9	8	0	8	16	23.9521	31.9521
ENSP00000369711	ELP3, Elongator complex protein 3, KAT9	13.7	0	6	19.7	17.9641	31.6641
ENSP00000471807	NAT14, N-acetyltransferase 14 (GCN5-related, putative), KLP1	31.3	Discarding	0	31.3	0	31.3
ENSP00000423385	KAT7, HBO1, HBOa, MYST2	27.3	3	0	30.3	0	30.3
ENSP00000240922	NAT13, N-acetyltransferase 13 (GCN5-related), NAA50, FLJ13194, MAK3(?), NAT5(?), San	12	0	6	18	17.9641	29.9641
ENSP00000428322	HGSNAT, heparan-alpha-glucosaminide N-acetyltransferase, TMEM76, HGNAT, FLJ32731	29.1	Discarding	0	29.1	0	29.1
ENSP00000424577	KAT7, HBO1, HBOa, MYST2	25.4	3	0	28.4	0	28.4
ENSP00000259021	KAT7, HBO1, HBOa, MYST2	25.1	3	0	28.1	0	28.1
ENSP00000398961	KAT7, HBO1, HBOa, MYST2	25.1	3	0	28.1	0	28.1
ENSP00000413415	KAT7, HBO1, HBOa, MYST2	23.6	3	0	26.6	0	26.6
ENSP00000407081	MGEA5, HEXC, KIAA0679, MEA5 (NOCAT, bifunctional)	8	0	6	14	17.9641	25.9641
ENSP00000359028	ARD1, NAA10, ARD1A, DXS707, TE2, ARD1A	11.3	2	4	17.3	11.976	25.276
ENSP00000452521	NAA30, NAT12, Mak3p, MAK3, FLJ35355, C14orf35	8.5	0	5.5	14	16.4671	24.9671
ENSP00000431819	KAT5, HTATIP, TIP60	24.8	0	0	24.8	0	24.8
ENSP00000328464	NAT8L, N-acetyltransferase 8-like (GCN5-related, putative)	3.8	0	7	10.8	20.9581	24.7581
ENSP00000427833	ELP3, Elongator complex protein 3, KAT9	24.3	Discarding	0	24.3	0	24.3
ENSP00000219797	KAT8, MOF, MYST1	8.8	0	5	13.8	14.9701	23.7701
ENSP00000391769	NAT16	8.6	0	5	13.6	14.9701	23.5701
ENSP00000380136	KAT6A, MOZ, MYST3, RUNXBP2, ZNF220	9.2	14	0	23.2	0	23.2
ENSP00000385888	KAT6A, MOZ, MYST3, RUNXBP2, ZNF220	9.2	14	0	23.2	0	23.2
ENSP00000265713	KAT6A, MOZ, MYST3, RUNXBP2, ZNF220	9.2	14	0	23.2	0	23.2
ENSP00000430606	KAT6A, MOZ, MYST3, RUNXBP2, ZNF220	9.2	14	0	23.2	0	23.2
ENSP00000472383	NAT14, N-acetyltransferase 14 (GCN5-related, putative), KLP1	23	0	0	23	0	23
ENSP00000414422	hTFIIIC110, GTF3C2	22.7	Discarding	0	22.7	0	22.7
ENSP00000359032	ARD1, NAA10, ARD1A, DXS707, TE2, ARD1A	11.3	2	3	16.3	8.98204	22.282
ENSP00000377315	ARD1, NAA10, ARD1A, DXS707, TE2, ARD1A	11.3	2	3	16.3	8.98204	22.282
ENSP00000340330	KAT5, HTATIP, TIP60	22	0	0	22	0	22
ENSP00000434765	KAT5, HTATIP, TIP60	22	0	0	22	0	22
ENSP00000413668	ARD1, NAA10, ARD1A, DXS707, TE2, ARD1A	11	2	3	16	8.98204	21.982
ENSP00000359026	ARD1, NAA10, ARD1A, DXS707, TE2, ARD1A	10.9	2	3	15.9	8.98204	21.882
ENSP00000359531	TFIIB, GTF2B	21.5	0	0	21.5	0	21.5
ENSP00000406037	KAT8, MOF, MYST1	8.8	0	4	12.8	11.976	20.776
ENSP00000402345	TFIIB, GTF2B	20.4	0	0	20.4	0	20.4
ENSP00000287239	MORF, KAT6B, MYST4, MOZ2, qkf, querkopf	7.9	12	0	19.9	0	19.9
ENSP00000361796	MORF, KAT6B, MYST4, MOZ2, qkf, querkopf	7.9	12	0	19.9	0	19.9
ENSP00000361809	MORF, KAT6B, MYST4, MOZ2, qkf, querkopf	7.9	12	0	19.9	0	19.9
ENSP00000361810	MORF, KAT6B, MYST4, MOZ2, qkf, querkopf	7.9	12	0	19.9	0	19.9
ENSP00000361799	MORF, KAT6B, MYST4, MOZ2, qkf, querkopf	7.9	12	0	19.9	0	19.9
ENSP00000415741	TFIIB, GTF2B	19.3	Discarding	0	19.3	0	19.3
ENSP00000463751	MED24, CRSP100, CRSP4, DRIP100, KIAA0130, THRAP4, TRAP100	8.6	0	3.5	12.1	10.479	19.079
ENSP00000311027	NAT5, N-acetyltransferase 5 (GCN5-related, putative), NAT3, NAA20, dJ1002M8.1,	15.8	1	0	16.8	0	16.8
ENSP00000367024	NAT11, N-acetyltransferase 11 (GCN5-related, putative), NAA40, FLJ13848	13.8	3	0	16.8	0	16.8
ENSP00000263253	p300, EP300, KAT3B	16.5	0	0	16.5	0	16.5
ENSP00000470543	NAT14, N-acetyltransferase 14 (GCN5-related, putative), KLP1	16.2	0	0	16.2	0	16.2
ENSP00000428449	ELP3, Elongator complex protein 3, KAT9	6.3	0	3	9.3	8.98204	15.282
ENSP00000262367	CREBBP, CBP, KAT3A, RSTS, RTS	15.1	0	0	15.1	0	15.1
ENSP00000371502	CREBBP, CBP, KAT3A, RSTS, RTS	15.1	0	0	15.1	0	15.1
ENSP00000459490	CREBBP, CBP, KAT3A, RSTS, RTS	14.9	Discarding	0	14.9	0	14.9
ENSP00000340908	CDYL, CDYL1	13.8	1	0	14.8	0	14.8
ENSP00000394076	CDYL, CDYL1	13.8	1	0	14.8	0	14.8
ENSP00000438639	NAT11, N-acetyltransferase 11 (GCN5-related, putative), NAA40, FLJ13848	11.6	3	0	14.6	0	14.6
ENSP00000430151	HGSNAT, heparan-alpha-glucosaminide N-acetyltransferase, TMEM76, HGNAT, FLJ32731	2.5	12	0	14.5	0	14.5
ENSP00000335636	NAT5, N-acetyltransferase 5 (GCN5-related, putative), NAT3, NAA20, dJ1002M8.1,	13.3	1	0	14.3	0	14.3
ENSP00000407578	NAT11, N-acetyltransferase 11 (GCN5-related, putative), NAA40, FLJ13848	7.1	7	0	14.1	0	14.1
ENSP00000430942	ELP3, Elongator complex protein 3, KAT9	14	Discarding	0	14	0	14
ENSP00000380718	CDYL, CDYL1	4.8	0	3	7.8	8.98204	13.782
ENSP00000434993	KAT5, HTATIP, TIP60	13.7	0	0	13.7	0	13.7
ENSP00000409043	hTFIIIC110, GTF3C2	4.4	Discarding	3	7.4	8.98204	13.382
ENSP00000417763	ARD1, NAA10, ARD1A, DXS707, TE2, ARD1A	11.3	2	0	13.3	0	13.3
ENSP00000385097	NCOA1, BHLHE74, SRC1, Nuclear receptor coactivator 1, RIP160, KAT13A	13.1	0	0	13.1	0	13.1
ENSP00000385216	NCOA1, BHLHE74, SRC1, Nuclear receptor coactivator 1, RIP160, KAT13A	13.1	0	0	13.1	0	13.1
ENSP00000288599	NCOA1, BHLHE74, SRC1, Nuclear receptor coactivator 1, RIP160, KAT13A	13.1	0	0	13.1	0	13.1
ENSP00000320940	NCOA1, BHLHE74, SRC1, Nuclear receptor coactivator 1, RIP160, KAT13A	13.1	0	0	13.1	0	13.1
ENSP00000379197	NCOA1, BHLHE74, SRC1, Nuclear receptor coactivator 1, RIP160, KAT13A	13.1	0	0	13.1	0	13.1
ENSP00000444039	NCOA1, BHLHE74, SRC1, Nuclear receptor coactivator 1, RIP160, KAT13A	13.1	0	0	13.1	0	13.1
ENSP00000308741	CLOCK, BHLHE8, KIAA0334, Circadian locomoter output cycles protein kaput, KAT13D	13	0	0	13	0	13
ENSP00000370723	CLOCK, BHLHE8, KIAA0334, Circadian locomoter output cycles protein kaput, KAT13D	13	0	0	13	0	13
ENSP00000426983	CLOCK, BHLHE8, KIAA0334, Circadian locomoter output cycles protein kaput, KAT13D	13	0	0	13	0	13
ENSP00000396649	CLOCK, BHLHE8, KIAA0334, Circadian locomoter output cycles protein kaput, KAT13D	13	0	0	13	0	13
ENSP00000424752	CSRP2BP, ATAC2, CRP2BP, dJ717M23.1, KAT14, PRO1194	12.1	0	0	12.1	0	12.1
ENSP00000458254	CREBBP, CBP, KAT3A, RSTS, RTS	11.7	Discarding	0	11.7	0	11.7
ENSP00000368965	HGSNAT, heparan-alpha-glucosaminide N-acetyltransferase, TMEM76, HGNAT, FLJ32731	9.7	2	0	11.7	0	11.7
ENSP00000278816	CSRP2BP, ATAC2, CRP2BP, dJ717M23.1, KAT14, PRO1194	11.6	0	0	11.6	0	11.6
ENSP00000392318	CSRP2BP, ATAC2, CRP2BP, dJ717M23.1, KAT14, PRO1194	11.6	0	0	11.6	0	11.6
ENSP00000366909	CSRP2BP, ATAC2, CRP2BP, dJ717M23.1, KAT14, PRO1194	11.6	0	0	11.6	0	11.6
ENSP00000354108	NAA60, HAT4, NAT15	10.4	1	0	11.4	0	11.4
ENSP00000459055	NAA60, HAT4, NAT15	10.4	1	0	11.4	0	11.4
ENSP00000385195	NCOA1, BHLHE74, SRC1, Nuclear receptor coactivator 1, RIP160, KAT13A	11.3	0	0	11.3	0	11.3
ENSP00000361073	NCOA3, ACTR, AIB1, bHLHe42, CAGH16, KAT13B, p/CIP, RAC3, SRC-3, SRC3, KAT13B, TNRC16, TRAM-1 AIB1, BHLHE42, RAC3, TRAM1, Nuclear receptor coactivator 3, CBP-interacting protein(pCIP), Receptor-associated coactivator 3(RAC-3), Steroid receptor coactivator protein 3(SRC-3), Thyroid hormone receptor activator molecule 1 (TRAM-1)	11.3	0	0	11.3	0	11.3
ENSP00000361065	NCOA3, ACTR, AIB1, bHLHe42, CAGH16, KAT13B, p/CIP, RAC3, SRC-3, SRC3, KAT13B, TNRC16, TRAM-1 AIB1, BHLHE42, RAC3, TRAM1, Nuclear receptor coactivator 3, CBP-interacting protein(pCIP), Receptor-associated coactivator 3(RAC-3), Steroid receptor coactivator protein 3(SRC-3), Thyroid hormone receptor activator molecule 1 (TRAM-1)	11.3	0	0	11.3	0	11.3
ENSP00000361066	NCOA3, ACTR, AIB1, bHLHe42, CAGH16, KAT13B, p/CIP, RAC3, SRC-3, SRC3, KAT13B, TNRC16, TRAM-1 AIB1, BHLHE42, RAC3, TRAM1, Nuclear receptor coactivator 3, CBP-interacting protein(pCIP), Receptor-associated coactivator 3(RAC-3), Steroid receptor coactivator protein 3(SRC-3), Thyroid hormone receptor activator molecule 1 (TRAM-1)	11.3	0	0	11.3	0	11.3
ENSP00000342123	NCOA3, ACTR, AIB1, bHLHe42, CAGH16, KAT13B, p/CIP, RAC3, SRC-3, SRC3, KAT13B, TNRC16, TRAM-1 AIB1, BHLHE42, RAC3, TRAM1, Nuclear receptor coactivator 3, CBP-interacting protein(pCIP), Receptor-associated coactivator 3(RAC-3), Steroid receptor coactivator protein 3(SRC-3), Thyroid hormone receptor activator molecule 1 (TRAM-1)	11.3	0	0	11.3	0	11.3
ENSP00000399968	NCOA2, BHLHE75, TIF2, KAT13C, GRIP, p160	11.1	0	0	11.1	0	11.1
ENSP00000456933	KAT8, MOF, MYST1	10.5	Blank	Skip	10.5	0	10.5
ENSP00000302968	CDY1, CDY1A, CDY1B, Testis-specific chromodomain protein Y 1	4.4	0	2	6.4	5.98802	10.388
ENSP00000354799	CDY1, CDY1A, CDY1B, Testis-specific chromodomain protein Y 1	4.4	0	2	6.4	5.98802	10.388
ENSP00000402280	CDY2A, CDY2, CDY2B, Testis-specific chromodomain protein Y2	4.4	0	2	6.4	5.98802	10.388
ENSP00000443344	MED24, CRSP100, CRSP4, DRIP100, KIAA0130, THRAP4, TRAP100	9.2	1	0	10.2	0	10.2
ENSP00000462539	MED24, CRSP100, CRSP4, DRIP100, KIAA0130, THRAP4, TRAP100	9.7	0	0	9.7	0	9.7
ENSP00000386326	ATF-2, CRE-BP1, CREB2, HB16, TREB7	9.7	0	0	9.7	0	9.7
ENSP00000376326	ATF-2, CRE-BP1, CREB2, HB16, TREB7	9.7	0	0	9.7	0	9.7
ENSP00000407911	ATF-2, CRE-BP1, CREB2, HB16, TREB7	9.7	0	0	9.7	0	9.7
ENSP00000443513	ATF-2, CRE-BP1, CREB2, HB16, TREB7	9.7	0	0	9.7	0	9.7
ENSP00000437952	ATF-2, CRE-BP1, CREB2, HB16, TREB7	9.7	0	0	9.7	0	9.7
ENSP00000387093	ATF-2, CRE-BP1, CREB2, HB16, TREB7	8.6	1	0	9.6	0	9.6
ENSP00000340576	ATF-2, CRE-BP1, CREB2, HB16, TREB7	8.6	1	0	9.6	0	9.6
ENSP00000416854	ATF-2, CRE-BP1, CREB2, HB16, TREB7	8.6	1	0	9.6	0	9.6
ENSP00000376363	HAT1, KAT1	9.1	0	0	9.1	0	9.1
ENSP00000216410	GNPNAT1, glucosamine-phosphate N-acetyltransferase 1, FLJ10607, Gpnat1	9.1	0	0	9.1	0	9.1
ENSP00000452032	GNPNAT1, glucosamine-phosphate N-acetyltransferase 1, FLJ10607, Gpnat1	9.1	0	0	9.1	0	9.1
ENSP00000399339	hTFIIIC110, GTF3C2	8.8	Discarding	0	8.8	0	8.8
ENSP00000394435	NAT16	8.8	0	0	8.8	0	8.8
ENSP00000286794	NAA11, ARD1B, ARD2, hARD2	8.7	0	0	8.7	0	8.7
ENSP00000300303	NAT16	8.6	0	0	8.6	0	8.6
ENSP00000395125	NAT16	8.6	0	0	8.6	0	8.6
ENSP00000263754	KAT2B, PCAF, GCN5, GCN5L, P/CAF	8.5	0	0	8.5	0	8.5
ENSP00000435939	KAT5, HTATIP, TIP60	8.2	Blank	Skip	8.2	0	8.2
ENSP00000393429	hTFIIIC110, GTF3C2	8.1	Discarding	0	8.1	0	8.1
ENSP00000354850	MGEA5, HEXC, KIAA0679, MEA5 (NOCAT, bifunctional)	8.1	0	0	8.1	0	8.1
ENSP00000350445	MGEA5, HEXC, KIAA0679, MEA5 (NOCAT, bifunctional)	8.1	0	0	8.1	0	8.1
ENSP00000359112	MGEA5, HEXC, KIAA0679, MEA5 (NOCAT, bifunctional)	8.1	0	0	8.1	0	8.1
ENSP00000409973	MGEA5, HEXC, KIAA0679, MEA5 (NOCAT, bifunctional)	8.1	0	0	8.1	0	8.1
ENSP00000458407	NAT6, N-acetyltransferase 6 (GCN5-related)	7.8	0	0	7.8	0	7.8
ENSP00000459800	NAT6, N-acetyltransferase 6 (GCN5-related)	7.8	0	0	7.8	0	7.8
ENSP00000459273	NAT6, N-acetyltransferase 6 (GCN5-related)	7.8	0	0	7.8	0	7.8
ENSP00000458495	NAT6, N-acetyltransferase 6 (GCN5-related)	7.7	0	0	7.7	0	7.7
ENSP00000428416	NAT2, N-acetyltransferase 2 (arylamine N-acetyltransferase)	7.5	0	0	7.5	0	7.5
ENSP00000442055	NAT11, N-acetyltransferase 11 (GCN5-related, putative), NAA40, FLJ13848	7.5	0	0	7.5	0	7.5
ENSP00000452310	GNPNAT1, glucosamine-phosphate N-acetyltransferase 1, FLJ10607, Gpnat1	7.4	0	0	7.4	0	7.4
ENSP00000396699	KAT6A, MOZ, MYST3, RUNXBP2, ZNF220	7.3	Blank	Skip	7.3	0	7.3
ENSP00000406995	ATF-2, CRE-BP1, CREB2, HB16, TREB7	7.3	Discarding	0	7.3	0	7.3
ENSP00000461703	NAA60, HAT4, NAT15	7.3	0	0	7.3	0	7.3
ENSP00000461507	NAA60, HAT4, NAT15	7.3	0	0	7.3	0	7.3
ENSP00000458575	NAA60, HAT4, NAT15	7.3	0	0	7.3	0	7.3
ENSP00000458928	NAA60, HAT4, NAT15	7.1	0	0	7.1	0	7.1
ENSP00000421368	KAT7, HBO1, HBOa, MYST2	6.9	Blank	Skip	6.9	0	6.9
ENSP00000459608	CIITA	6.8	0	0	6.8	0	6.8
ENSP00000459275	NAA60, HAT4, NAT15	6.8	0	0	6.8	0	6.8
ENSP00000459188	NAA60, HAT4, NAT15	6.8	0	0	6.8	0	6.8
ENSP00000461095	NAT6, N-acetyltransferase 6 (GCN5-related)	6.8	0	0	6.8	0	6.8
ENSP00000408174	hTFIIIC110, GTF3C2	6.7	0	0	6.7	0	6.7
ENSP00000461443	NAA60, HAT4, NAT15	6.7	0	0	6.7	0	6.7
ENSP00000458505	NAA60, HAT4, NAT15	6.7	0	0	6.7	0	6.7
ENSP00000461002	CREBBP, CBP, KAT3A, RSTS, RTS	6.6	Discarding	0	6.6	0	6.6
ENSP00000354972	MAK10, MAK10 homolog, amino-acid N-acetyltransferase subunit (S. cerevisiae), NAA35, bA379P1.1, FLJ21613, FLJ22643	6.6	0	0	6.6	0	6.6
ENSP00000365208	MAK10, MAK10 homolog, amino-acid N-acetyltransferase subunit (S. cerevisiae), NAA35, bA379P1.1, FLJ21613, FLJ22643	6.6	0	0	6.6	0	6.6
ENSP00000399595	MAK10, MAK10 homolog, amino-acid N-acetyltransferase subunit (S. cerevisiae), NAA35, bA379P1.1, FLJ21613, FLJ22643	6.6	0	0	6.6	0	6.6
ENSP00000366245	KAT5, HTATIP, TIP60	6.5	0	0	6.5	0	6.5
ENSP00000461730	NAA60, HAT4, NAT15	6.5	0	0	6.5	0	6.5
ENSP00000460763	NAA60, HAT4, NAT15	6.5	0	0	6.5	0	6.5
ENSP00000429446	ELP3, Elongator complex protein 3, KAT9	6.4	0	0	6.4	0	6.4
ENSP00000430348	NCOA2, BHLHE75, TIF2, KAT13C, GRIP, p160	6.4	Blank	Skip	6.4	0	6.4
ENSP00000385903	NAA60, HAT4, NAT15	6.4	0	0	6.4	0	6.4
ENSP00000405873	NAA60, HAT4, NAT15	6.4	0	0	6.4	0	6.4
ENSP00000393224	NAA60, HAT4, NAT15	6.4	0	0	6.4	0	6.4
ENSP00000458667	NAA60, HAT4, NAT15	6.4	0	0	6.4	0	6.4
ENSP00000459057	NAA60, HAT4, NAT15	6.4	0	0	6.4	0	6.4
ENSP00000459750	NAA60, HAT4, NAT15	6.4	0	0	6.4	0	6.4
ENSP00000459084	NAA60, HAT4, NAT15	6.4	0	0	6.4	0	6.4
ENSP00000459544	NAA60, HAT4, NAT15	6.4	0	0	6.4	0	6.4
ENSP00000459790	NAA60, HAT4, NAT15	6.4	0	0	6.4	0	6.4
ENSP00000428532	ELP3, Elongator complex protein 3, KAT9	6.3	0	0	6.3	0	6.3
ENSP00000429248	ELP3, Elongator complex protein 3, KAT9	6.3	0	0	6.3	0	6.3
ENSP00000352536	hTFIIIC110, GTF3C2	6.3	0	0	6.3	0	6.3
ENSP00000389518	hTFIIIC110, GTF3C2	6.3	0	0	6.3	0	6.3
ENSP00000264720	hTFIIIC110, GTF3C2	6.3	0	0	6.3	0	6.3
ENSP00000269214	ESCO1, EFO1, KIAA1911, ESO1, yeast Eco1, CTF7	6.3	0	0	6.3	0	6.3
ENSP00000436247	KAT5, HTATIP, TIP60	6.2	Discarding	0	6.2	0	6.2
ENSP00000344955	KAT5, HTATIP, TIP60	6.1	0	0	6.1	0	6.1
ENSP00000463760	NAT9	6.1	0	0	6.1	0	6.1
ENSP00000429573	ELP3, Elongator complex protein 3, KAT9	6	0	0	6	0	6
ENSP00000460834	NAT6, N-acetyltransferase 6 (GCN5-related)	6	No data	Skip	6	0	6
ENSP00000461085	NAT6, N-acetyltransferase 6 (GCN5-related)	5.8	0	0	5.8	0	5.8
ENSP00000430850	NCOA2, BHLHE75, TIF2, KAT13C, GRIP, p160	5.7	Blank	Skip	5.7	0	5.7
ENSP00000429132	NCOA2, BHLHE75, TIF2, KAT13C, GRIP, p160	5.4	Discarding	0	5.4	0	5.4
ENSP00000361219	TF3C4, GTF3C4, hTFIIIC90, TF3C-delta, General transcription factor 3C polypeptide 4, KAT12	5.4	0	0	5.4	0	5.4
ENSP00000431378	TF3C4, GTF3C4, hTFIIIC90, TF3C-delta, General transcription factor 3C polypeptide 4, KAT12	5.4	0	0	5.4	0	5.4
ENSP00000307218	NAT1, N-acetyltransferase 1 (arylamine N-acetyltransferase), AAC1	5.4	0	0	5.4	0	5.4
ENSP00000440434	NAT1, N-acetyltransferase 1 (arylamine N-acetyltransferase), AAC1	5.4	0	0	5.4	0	5.4
ENSP00000429407	NAT1, N-acetyltransferase 1 (arylamine N-acetyltransferase), AAC1	5.4	0	0	5.4	0	5.4
ENSP00000428270	NAT1, N-acetyltransferase 1 (arylamine N-acetyltransferase), AAC1	5.4	0	0	5.4	0	5.4
ENSP00000444609	NAT1, N-acetyltransferase 1 (arylamine N-acetyltransferase), AAC1	5.4	0	0	5.4	0	5.4
ENSP00000440900	NAT1, N-acetyltransferase 1 (arylamine N-acetyltransferase), AAC1	5.4	0	0	5.4	0	5.4
ENSP00000429341	NAT1, N-acetyltransferase 1 (arylamine N-acetyltransferase), AAC1	5.4	0	0	5.4	0	5.4
ENSP00000205194	NAT14, N-acetyltransferase 14 (GCN5-related, putative), KLP1	5.4	0	0	5.4	0	5.4
ENSP00000460474	CREBBP, CBP, KAT3A, RSTS, RTS	4.5	Discarding	0	4.5	0	4.5
ENSP00000286479	NAT2, N-acetyltransferase 2 (arylamine N-acetyltransferase)	4.5	0	0	4.5	0	4.5
ENSP00000250838	CDY2A, CDY2, CDY2B, Testis-specific chromodomain protein Y2	4.4	0	0	4.4	0	4.4
ENSP00000264108	HAT1, KAT1	4.3	0	0	4.3	0	4.3
ENSP00000424526	TAF1(TAFII250)	4.3	Discarding	0	4.3	0	4.3
ENSP00000381603	NAT5, N-acetyltransferase 5 (GCN5-related, putative), NAT3, NAA20, dJ1002M8.1,	4.1	0	0	4.1	0	4.1
ENSP00000413064	NAT8L, N-acetyltransferase 8-like (GCN5-related, putative)	3.6	0	0	3.6	0	3.6
ENSP00000393464	MED24, CRSP100, CRSP4, DRIP100, KIAA0130, THRAP4, TRAP100	3.1	Discarding	0	3.1	0	3.1
ENSP00000362895	TAF1(TAFII250)	2.8	0	0	2.8	0	2.8
ENSP00000276072	TAF1(TAFII250)	2.8	0	0	2.8	0	2.8
ENSP00000389000	TAF1(TAFII250)	2.8	0	0	2.8	0	2.8
ENSP00000406549	TAF1(TAFII250)	2.8	0	0	2.8	0	2.8
ENSP00000421839	NAA15, FLJ13340, NARG1, NATH, TBDN100	2.4	0	0	2.4	0	2.4
